# Supplementary material for: Enhanced Microwave Absorption Bandwidth in Graphene-Encapsulated Iron Nanoparticles with Core–Shell Structure
Source: MDPI journal article supplement (doi:10.3390/nano10050931), 2020-05-12
Supplement: s1 [file s1]

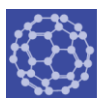

## Supporting information

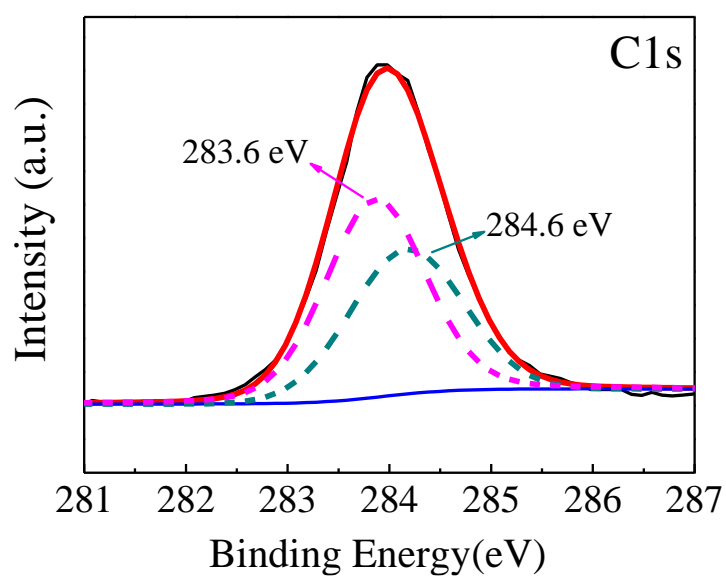

Figure S1. C1s XPS spectra of the Fe(G) nanoparticles.

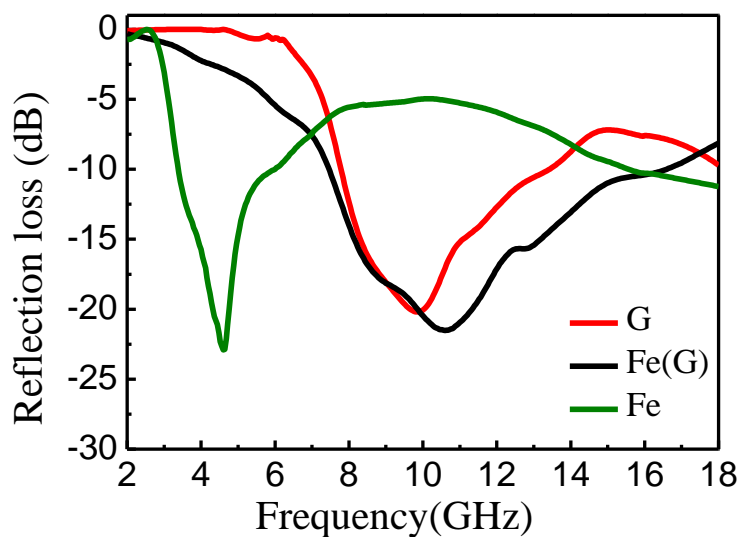

Figure S2. Frequency dependences of R for a Fe(G)/paraffin composite with 40 wt% loading as compared to only graphene (G) and only iron nanoparticles (Fe) of 3 mm in thickness under 2–18 GHz.
